# Supplementary material for: Diversity Bears Fruit: Evaluating the Economic Potential of Undervalued Fruits for an Agroecological Restoration Approach in the Peruvian Amazon
Source: MDPI journal article supplement (doi:10.3390/su13084582), 2021-04-20
Supplement: s1 [file s1]

## Supplementary material

**Table S1:** 21 tree-based foods from Madre de Dios, Peruvian Amazon, identified based on a literature review.

| Common name           | Scientific name               | Edible (E) or medicinal (M) function |
|-----------------------|-------------------------------|--------------------------------------|
| Copoazú               | <i>Theobroma grandiflorum</i> | E                                    |
| Peach Palm or Pijuayo | <i>Bactris gasipaes</i>       | E                                    |
| Guanabana             | <i>Annona muricata</i>        | E                                    |
| Guaba                 | <i>Inga edulis</i>            | E                                    |
| Aguaje                | <i>Mauritia flexuosa</i>      | E                                    |
| Camu Camu             | <i>Myrciaria dubia</i>        | E                                    |
| Ungurahui             | <i>Oenocarpus bataua</i>      | E, M                                 |
| Huasai                | <i>Euterpe precatoria</i>     | E, M                                 |
| Huicungo              | <i>Astrocaryum murumuru</i>   | E, M                                 |
| Caimito               | <i>Pouteria caimito</i>       | E, M                                 |
| Charichuelo           | <i>Garcinia macrophylla</i>   | E                                    |
| Shihuahuaco           | <i>Dipteryx micranta</i>      | E                                    |
| Shapaja               | <i>Attalea phalerata</i>      | E, M                                 |
| Shebon                | <i>Attalea butyracea</i>      | E, M                                 |
| Lucuma                | <i>Lucuma macrophylla</i>     | E                                    |
| Ubos                  | <i>Spondias mombin</i>        | E, M                                 |
| Uvilla                | <i>Pourouma cecropiifolia</i> | E, M                                 |
| Arazá fruit           | <i>Eugenia stipitata</i>      | E                                    |
| Cocona                | <i>Solanum sessiliflorum</i>  | E                                    |
| Copaiba               | <i>Copaifera officinalis</i>  | M                                    |
| Sangre de Grado       | <i>Croton dracanoides</i>     | M                                    |

**Table S2:** Sector of the interviewees for both sets of interviews, with local agroforestry and commercial specialists of Madre de Dios, Peruvian Amazon.

| Sector | Institutions related to the local agroforestry specialists                                                                                     | Institutions related to the local commercial specialists                    |
|--------|------------------------------------------------------------------------------------------------------------------------------------------------|-----------------------------------------------------------------------------|
| NGO    | PROFONANPE (Fondo Nacional para Áreas Naturales Protegidas por el Estado)<br><a href="https://profonanpe.org.pe">https://profonanpe.org.pe</a> | Camino Verde<br><a href="http://caminoverde.org">http://caminoverde.org</a> |
|        | ArBio <a href="https://www.arbioperu.com">https://www.arbioperu.com</a>                                                                        |                                                                             |
|        | CINCIA (2)<br>(Centro de Innovación Científica Amazónica)<br><a href="https://cincia.wfu.edu">https://cincia.wfu.edu</a>                       |                                                                             |
|        | Camino Verde <a href="http://caminoverde.org">http://caminoverde.org</a>                                                                       |                                                                             |
|        | Caritas Perú <a href="https://www.caritas.org.pe/zona-sur/">https://www.caritas.org.pe/zona-sur/</a>                                           |                                                                             |

|                            |                                                                                                                                                                                                 |                                                                                                                                          |
|----------------------------|-------------------------------------------------------------------------------------------------------------------------------------------------------------------------------------------------|------------------------------------------------------------------------------------------------------------------------------------------|
| Association                | AAE (2)<br>(Asociación Agricultura Ecológica)<br><a href="http://www.ecodely.com">www.ecodely.com</a>                                                                                           | PALSAMAD (Asociación de Palmicultores San Juan)                                                                                          |
| Academia / public research | IIAP (Instituto de Investigaciones de la Amazonía Peruana)<br><a href="http://www.iiap.org.pe/web/iiap_region_madre_de_dios.aspx">http://www.iiap.org.pe/web/iiap_region_madre_de_dios.aspx</a> | UNAMAD (3)<br>(Universidad Nacional Amazónica de Madre de Dios)<br><a href="https://unamad.edu.pe">https://unamad.edu.pe</a>             |
|                            |                                                                                                                                                                                                 | CITE productivo<br><a href="https://www.itp.gob.pe/cite-productivo/madrededios/">https://www.itp.gob.pe/cite-productivo/madrededios/</a> |
| Private sector             |                                                                                                                                                                                                 | INALA<br><a href="https://inalagroindustria.com">https://inalagroindustria.com</a>                                                       |
| Other                      | None (2)                                                                                                                                                                                        |                                                                                                                                          |

**Table S3:** Questionnaire for the interview with local agroforestry specialists in Madre de Dios, Peruvian Amazon, in order to identify 10 high-potential NUS.

| Benefits      | Criteria                       | Question                                                                                                                                                             |
|---------------|--------------------------------|----------------------------------------------------------------------------------------------------------------------------------------------------------------------|
| Environmental | Growing conditions             | Does the species have tolerance for the following environmental conditions: <ul style="list-style-type: none"> <li>• Droughts?</li> <li>• Degraded soils?</li> </ul> |
|               | Ecosystem services             | Does the species positively affect the soil quality or texture?                                                                                                      |
| Nutritional   | Perceived nutritional benefits | Is the species known to be: <ul style="list-style-type: none"> <li>• Nutritive?</li> <li>• Medicinal?</li> </ul>                                                     |
|               | Diet diversification           | Does the species have the potential to diversify the local diet?                                                                                                     |
| Commercial    | Market value                   | Does the species have an established market?                                                                                                                         |
|               | Market potential               | Does the species have market potential, locally or internationally?                                                                                                  |

**Table S4a:** Questionnaire for the interview with market specialists in Madre de Dios, Peruvian Amazon. Each question is asked for each of the 10 high-potential species that the specialist has experience with.

|                                                                                                                                                                                                |
|------------------------------------------------------------------------------------------------------------------------------------------------------------------------------------------------|
| What do you know about the species productivity in terms of yields over time?                                                                                                                  |
| During which season does the species produce yields?                                                                                                                                           |
| How long can the fresh product be preserved?                                                                                                                                                   |
| Can the product be transformed (e.g. dried)?                                                                                                                                                   |
| What is the current state/recognition of this species on the market (local and international)? What is its current price on the market? How much do the farmers receive from it (raw product)? |
| Do you know where the species is marketed in or outside of Peru?                                                                                                                               |
| Is there any type of incentive or support for the growth of this species?                                                                                                                      |
| How do you see the future of the commercialisation of this species? Is it worth telling farmers to plant more of it?                                                                           |

What do you think of the high-potential species list, are they representative of the most promising species for AFS?

**Table S4b:** Questionnaire for the interview with farmers in Madre de Dios, Peruvian Amazon.

|                                                                                                                                                      |
|------------------------------------------------------------------------------------------------------------------------------------------------------|
| <b>Background</b>                                                                                                                                    |
| Name?                                                                                                                                                |
| Could you talk about your farm's history, when and why you started working on it?                                                                    |
| What are your main products?                                                                                                                         |
| <b>Quantification</b>                                                                                                                                |
| How many hectares do you have? How many hectares do you have under AFS?                                                                              |
| How far is your plot located? How do you get there?                                                                                                  |
| Did you take up a loan to start the system? After how much time did it become profitable?                                                            |
| What are the maintenance costs throughout time?                                                                                                      |
| How many family members/people work on your plot throughout the year? For how many hours a week?                                                     |
| What is the main source of income for your family? How much does the plot contribute to that in percentage?                                          |
| How much does the plot contribute to your familiar food consumption?                                                                                 |
| <b>Agrobiodiversity</b>                                                                                                                              |
| How many species do you cultivate in your AFS?                                                                                                       |
| Which of the high-potential (HP) species do you have on your farm? Which are your favourites from the list? (show list)                              |
| What is the main reason you chose to integrate them into your system? Which benefits do you get from them?                                           |
| What do you know about the species productivity in terms of yields over time? (for each HP species)                                                  |
| During which season does the species produce yields? (for each HP species)                                                                           |
| Do you sell your HP products? If so, where and how do you sell your HP products? For what price? How much of it do you sell per year/season (yield)? |
| How did you provide yourself with them (seeds, seedlings)? Where from?                                                                               |
| Would you recommend the use of HP species to other farmers? If not, which other species would you recommend for AFS and why?                         |
| What do you think of the rest of the HP list? Would you cultivate these species? Why (not)?                                                          |
| <b>Challenges</b>                                                                                                                                    |
| What are the main challenges of practicing AF? (climate change? Market access? Initial investment?)                                                  |
| Do you apply strategies to overcome the challenges? (Fireproof species, watering, cooperatives?)                                                     |
| What would be a driver for you to plant more species? (market, neighbours, time, less workload?)                                                     |
| How do you see the future of your farm?                                                                                                              |

**Table S5:** Source of the collected data to estimate the profitability of NUS production in smallholder-managed agroforestry systems in Madre de Dios, Peruvian Amazon.

| Description of data                                                          | Source                                                                                                                                                       |
|------------------------------------------------------------------------------|--------------------------------------------------------------------------------------------------------------------------------------------------------------|
| <b>Farm characteristics used to design the mixed NUS agroforestry system</b> |                                                                                                                                                              |
| Size of farm                                                                 | Farmer interviews                                                                                                                                            |
| Number of species managed                                                    | Farmer interviews                                                                                                                                            |
| Density of plantation                                                        | Field observation (during which farmers confirmed observations by providing the chosen cropping density)                                                     |
| Design structure                                                             | Field observation confirmed by the extensive commercial specialist interview (Camino Verde)                                                                  |
| <b>Income-related data</b>                                                   |                                                                                                                                                              |
| First year of harvest                                                        | Farmer and commercial specialists' interviews                                                                                                                |
| Months of production per year                                                | Farmer and commercial specialists' interviews for the species <i>Theobroma grandiflorum</i> and commercial specialists interviews only for the other species |
| Productivity per tree (yields)                                               | Farmer and commercial specialists' interviews                                                                                                                |
| Price per unit on the local market                                           | Farmer and commercial specialists' interviews                                                                                                                |
| Gradual increase in production                                               | Commercial specialist extensive interview (Camino Verde)                                                                                                     |
| <b>Cost-related data</b>                                                     |                                                                                                                                                              |
| Seedling costs                                                               | Commercial specialist extensive interview (Camino Verde)                                                                                                     |
| Replacement rates throughout time                                            | Commercial specialist extensive interview (Camino Verde)                                                                                                     |
| Local salary of hired labor                                                  | Commercial specialist extensive interview (Camino Verde)                                                                                                     |
| Transportation to the market                                                 | Farmer interview (later round)                                                                                                                               |
| Losses due to unsold product                                                 | Farmer interview (later round, at the weekly food fair)                                                                                                      |
| Months of production per year                                                | Farmer and commercial specialists' interviews for the species <i>Theobroma grandiflorum</i> and commercial specialists interviews only for the other species |

**Table S6:** Estimated years until first harvest, production and prices of high-potential NUS in Madre de Dios, Peruvian Amazon. Values are based on interviews of farmers (n=23) and market specialists (n=7).

|   |       | Years until first harvest |      |   | Production (unit/yr/tree) |       |   | Price (PEN/unit) |      |   |
|---|-------|---------------------------|------|---|---------------------------|-------|---|------------------|------|---|
|   | Fruit | mean                      | sd   | n | mean                      | sd    | n | mean             | sd   | n |
| 1 | Acai  | 3.5                       | 0.63 | 6 | 17.9                      | 12.77 | 4 | 2                | 1.41 | 2 |

|    |           |     |      |   |       |        |    |     |      |    |
|----|-----------|-----|------|---|-------|--------|----|-----|------|----|
| 2  | Aguaje    | 6.9 | 2.01 | 7 | 161.3 | 127.13 | 12 | 1.4 | 0.36 | 12 |
| 3  | Araza     | 2.6 | 1.92 | 4 | 20.8  | 17.15  | 6  | 3.3 | 2.32 | 10 |
| 4  | Camu-camu | 4   | 1    | 3 | 66.2  | 70.87  | 4  | 5.8 | 2.34 | 7  |
| 5  | Cocona    | 1   | 0    | 3 | 10.9  | 9.84   | 5  | 2.5 | 0.61 | 6  |
| 6  | Copoazu   | 3.2 | 0.98 | 6 | 14.6  | 19.45  | 6  | 6.7 | 2.53 | 16 |
| 7  | Guaba     | 1.9 | 0.89 | 5 | 139.4 | 80.02  | 8  | 0.9 | 0.30 | 10 |
| 8  | Guanabana | 4.5 | 3.53 | 2 | 4.8   | 0.29   | 3  | 2.7 | 1.71 | 4  |
| 9  | Pijuayo   | 4   | 1.15 | 4 | 27.3  | 11.98  | 7  | 3   | 1.22 | 8  |
| 10 | Ungurahui | 18  | 8.57 | 5 | 49.2  | 32.16  | 6  | 2.4 | 0.81 | 6  |

**Table S7.** Scores for each of the 21 species identified in the literature review regarding their ecological, economic and nutritional benefits, based on interviews with local agroforestry specialists in Madre de Dios, Peru. The species are ranked in increasing order for total scores.

| Species (common name) | Score on the questionnaire (in percent of 'yes') |                      |                         |
|-----------------------|--------------------------------------------------|----------------------|-------------------------|
|                       | Ecological benefit (%)                           | Economic benefit (%) | Nutritional benefit (%) |
| Huicungo              | 39                                               | 27                   | 55                      |
| Charichuelo           | 30                                               | 50                   | 58                      |
| Uvilla                | 61                                               | 41                   | 45                      |
| Shihuahuaco           | 67                                               | 36                   | 48                      |
| Shapaja               | 67                                               | 27                   | 58                      |
| Shebon                | 64                                               | 32                   | 61                      |
| Ubos                  | 45                                               | 64                   | 70                      |
| Copaiba               | 48                                               | 95                   | 36                      |
| Lucuma                | 42                                               | 82                   | 64                      |
| Sangre de Drago       | 58                                               | 95                   | 36                      |
| Caimito               | 45                                               | 82                   | 67                      |
| Ungurahui             | 33                                               | 86                   | 82                      |
| Araza                 | 33                                               | 95                   | 76                      |
| Camu-Camu             | 21                                               | 100                  | 88                      |
| Pijuayo               | 52                                               | 86                   | 73                      |
| Guaba                 | 94                                               | 64                   | 58                      |
| Guanabana             | 52                                               | 82                   | 82                      |
| Cocona                | 48                                               | 91                   | 82                      |
| Huasai                | 61                                               | 91                   | 79                      |
| Aguaje                | 48                                               | 100                  | 82                      |
| Copoazu               | 67                                               | 100                  | 73                      |

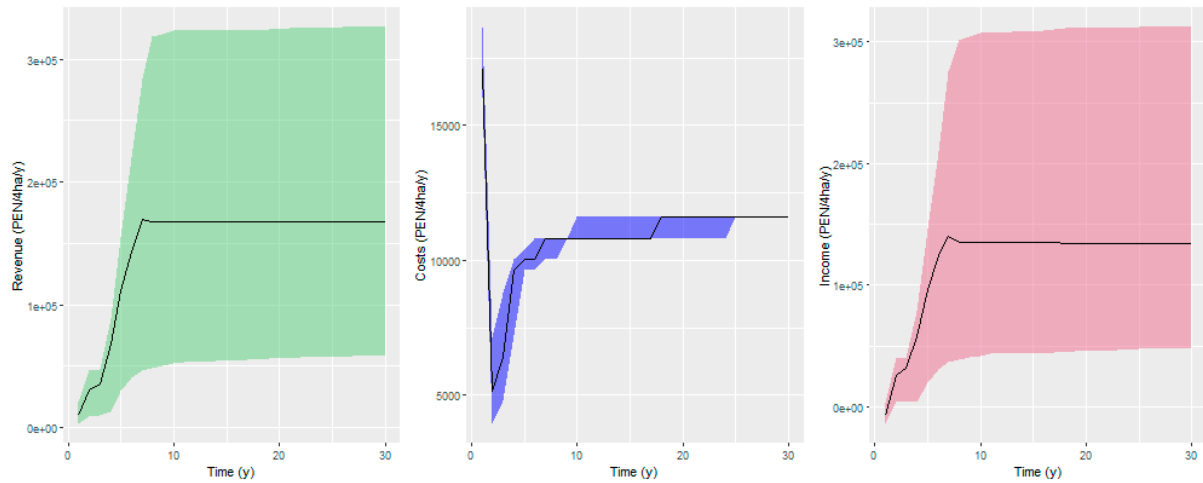

**Figure S1.** Projected revenue (a), costs (b) and profit (c) for a diverse agroforestry system based on 10 NUS with high economic, ecological and nutritional potential as indicated by farmers and specialists in Madre de Dios, Peruvian Amazon. The species that were included in the modelled system were copoazu, guaba, huasai, aguaje, cocona, pijuayo, guanabana, arazá, ungurahui and camu-camu and their number per category was randomized. The colored areas indicate 95% bootstrap confidence intervals.
